# Supplementary material for: Distribution and characterization of extrachromosomal circular DNA in colorectal cancer
Source: PubMed Central journal article supplement (PMC9718908; doi:10.1186/s43556-022-00104-0), 2022-12-02
Supplement: 43556_2022_104_MOESM1_ESM.pdf [file 43556_2022_104_MOESM1_ESM.pdf]

## Supplementary information

# Distribution and characterization of extrachromosomal circular DNA in colorectal cancer

Zhehang Chen<sup>1,3,#</sup>, Yadong Qi<sup>1,3,#</sup>, Jiamin He<sup>1,3,#</sup>, Chaochao Xu<sup>1,3</sup>, Qiwei Ge<sup>1,2</sup>, Wei Zhuo<sup>3,4,5</sup>,  
Jianmin Si<sup>1,3,4,\*</sup>, Shujie Chen<sup>1,3,4,\*</sup>

### Supplementary Fig. 1-3

**Supplementary Fig. 1 Length distribution of eccDNA in colorectal cancer and normal tissues.** **a** Histogram of the reads mapping rate of eccDNA in each tumor group and normal group. **b-f** Cumulative frequency plots of eccDNA in tumor group and normal group.

**Supplementary Fig. 2 Chromosomal distribution and origin of genes highly-expressed both in Circle-seq and RNA-seq.** **a** Heatmap of 219 genes highly-expressed both in Circle-seq and RNA-seq in each group. **b** Genomic distribution of 219 genes highly-expressed both in Circle-seq and RNA-seq.

**Supplementary Fig. 3 Verification of eccDNA in colorectal cancer cell lines.** **a** Gel electrophoresis result of the total DNA. HG: genome DNA of HCT116. HLE: total DNA with linear DNA elimination of HCT116. LG: genome DNA of LoVo. LLE: total DNA with linear DNA elimination of LoVo. **b** Schematic representation of the sequencing results of the PCR products of gene TP53I3 in samples after RCA with matching the sequence in chr2. **c** DNA electrophoresis of inverse PCR for junction sites of synthetic eccDNAs to prove transfection effectivity in HCT116. G: genome DNA. LE: total DNA with linear DNA elimination. RCA: total DNA with linear DNA elimination after RCA.

Supplementary Fig. 1

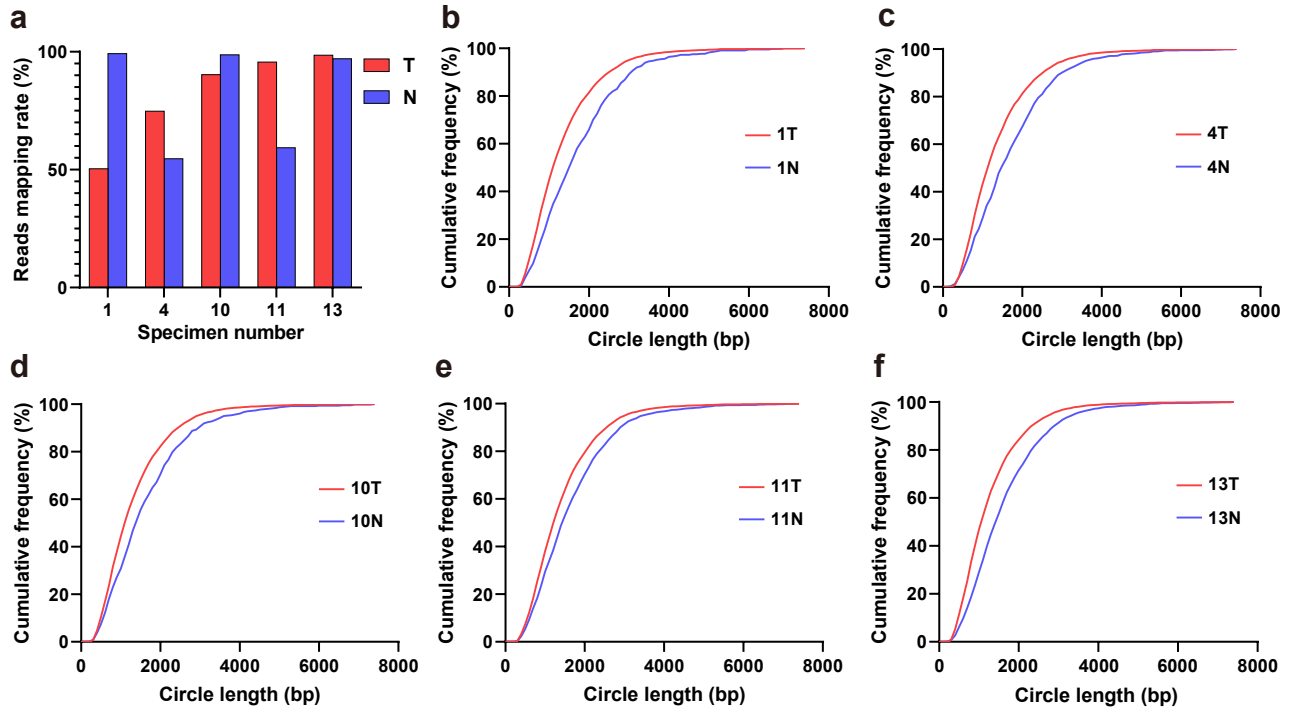

Supplementary Fig. 2

**a**

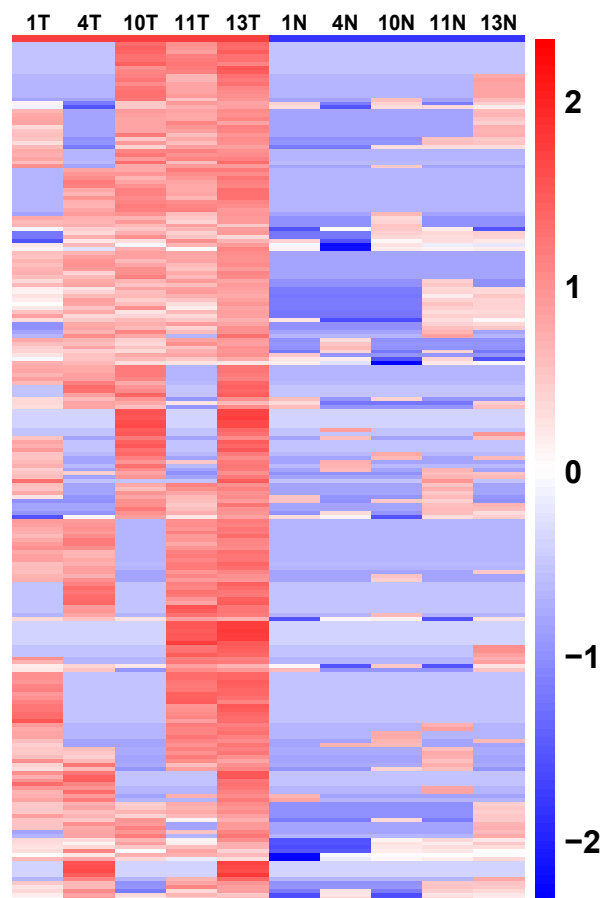

**b**

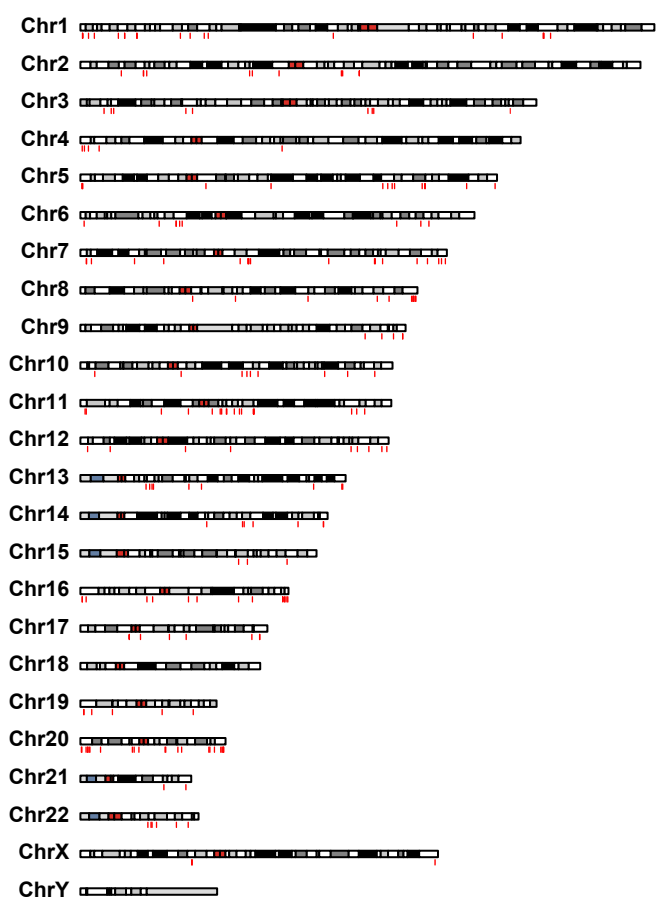

Supplementary Fig. 3

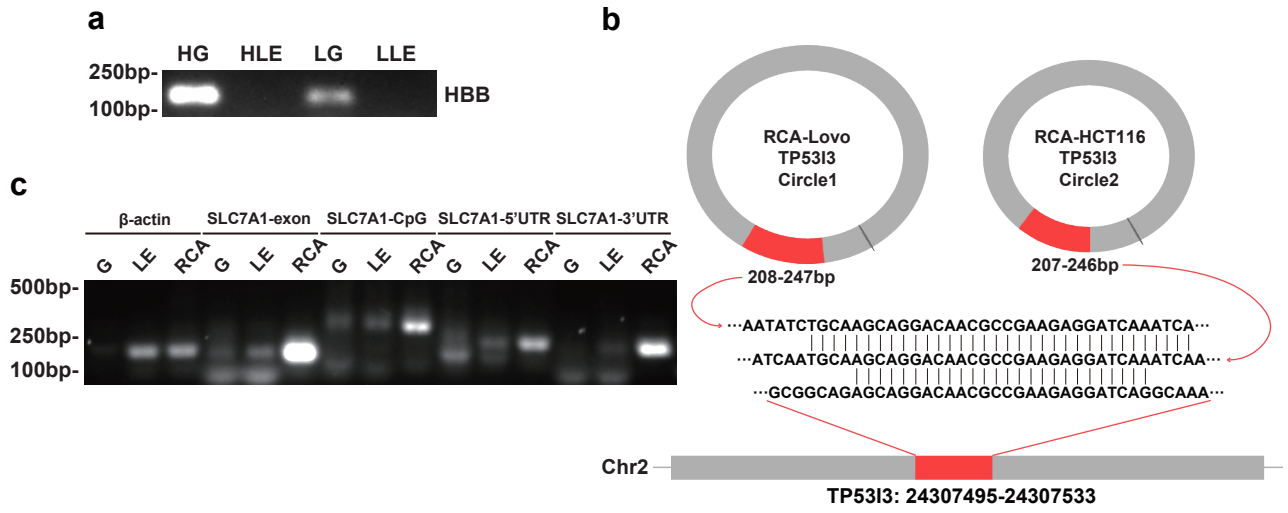

## Supplementary table 1-5

**Supplementary Table 1**

Sequences of inverse primers<sup>1</sup> and PCR reaction<sup>2</sup>

| Gene    | Primer | Sequences                     | PCR conditions                      |
|---------|--------|-------------------------------|-------------------------------------|
| ERBB2   | FRD:   | 5'-GCCGTGGCTCACACCTGTAATC-3'  | 1. 98°C for 2 min                   |
|         | REV:   | 5'-AGCAAGTTCCCAGACCTCCAGG-3'  |                                     |
| MYCBPAP | FRD:   | 5'-TTCGGCAGAGTGGCGGCAAT-3'    | 2. 35 cycles of:<br>98°C for 10 sec |
|         | REV:   | 5'-AGAGCAAACAACCCAGCAGAGC-3'  |                                     |
| TP53I3  | FRD:   | 5'-AACCTCTTGGCGGGCGGATT-3'    | 60°C for 15 sec                     |
|         | REV:   | 5'-TGATCCTCTTCGGCGTTGTCCT-3'  |                                     |
| EGFR    | FRD:   | 5'-ACCTCCATCAGTGGCGATCTCC-3'  | 72°C for 10 sec                     |
|         | REV:   | 5'-GCCGCAATGTGGACAATACAGG-3'  |                                     |
| SLC7A1  | FRD:   | 5'-GGCAGGCTTGCTTTAGCATTGA-3'  | 3. 72°C for 5 min                   |
|         | REV:   | 5'-TGTGAGAGGCATGTTTCGTGTCT-3' |                                     |
| SLC29A1 | FRD:   | 5'-CCTGCCCTGGGTGGTATGAACT-3'  | 4. 4°C for save                     |
|         | REV:   | 5'-GCTAAAGGCTTGGTTCGGAGGC-3'  |                                     |

<sup>1</sup> Oligonucleotide primers were designed by Primer Premier 6.0

<sup>2</sup> PCR reaction was performed on ProFlex™ PCR System (Thermo Fisher)

## Supplementary Table 2

### Sequences of the synthetic eccDNAs

---

#### **ecc $\beta$ -actin: 358bp**

GCTCATTGCCAATGGTGATGACCTGGCCGTCAGGCAGCTCGTAGCTCTTCTCCAGGG  
AGGAGCTGGAAGCAGCCGTGGCCATCTCTTGCTCGAAGTCCAGGGCGACGTAGCAC  
AGCTTCTCCTTAATGTCACGCACGATTTCCCCGCTCGGCCGTGGTGGTGAAGCTGTAG  
CCGCGCTCGGTGAGGATCTTCATGAGGTAGTCAGTCAGGTCGCCAGCCAGGTC  
CAGACGCAGGATGGCATGGGGGAGGGCATACCCCTCGTAGATGGGCACAGTGTGGG  
TGACCCCGTCACCGGAGTCCATCACGATGCCAGTGGTACGGCCAGAGGCGTACAGG  
GATAGCACAGCCTGGATAGC

---

#### **eccSLC7A1-exon: 335bp**

CCCCACCACCCTGCAATTTCCCCGTCCTCGGAACTGTCTCACGAGACCACCAGCGC  
ACAGACACGAACATGCCTCTCACACACCCCAGAACGCAGCTGTGCTGGAGTTGGGC  
ACAAAGGCCCTCACTCCCTGTCTTCATGGTGTGGGTTCTTGGCTGCCAACAGAACT  
GTCAGCCTTTATTAAGAAGGAAGGGTCTGTGTAAAAATGGGATGTGTGAATCAGAA  
GAGGGGCCCTGGCACAGAGCCAGGCAGGCTTGCTTTAGCATTGAGTCCTGCGTCGC  
GCAATGCCCAGGACCTTGCTGTAAAGTCTGGGTGGGGCCCCTATGGGGCATGT

---

#### **eccSLC7A1-CpG: 382bp**

CCCGGAGAACCGGCTGCAGAGCCGAGGGTGGGCTGGGGCTGCAGGTCAAGTAATT  
GCACCTTTGGCTGCAGTGAGGGTGTGGACGCAGGTGGTTTCTGTTGCACTGGTGGG  
GAGGGTGGGGTGCCTCCCGGTCCTCTGGGGCGTCCCTCGGGGCTGCTGCCACCTC  
CGGGGGGCGGGGCTGTGCGTCACTTGCCTCAAGTTGCCGTCAGGAGTCCTT  
GCTTGGTCGGCATCCAGGGACGCCTCCTCGCTGTGCCACAGGCCATAGCCAAAGTA  
GATGATGAAGCCTGCGGGCCGACAGCAGAGACGGGCGTGAACAGACCGCCGGTTG  
CACCACCGCAGGCAGGGCTCAGAGCCCAGGGCGGTCCCACAGCAAACC

---

#### **eccSLC7A1-5'UTR: 387bp**

GCACTGCTGATGAAACCTGGCGCCGGAACCCGCCAGCCCTCGGCGCCCATTCAGTC  
CGCGCAGGCAGGTGTGAGCAGCGGGTCAACTACCTGGCAGGCGCGCACGCGGCCG  
CGGGTCCCCGCTAACCGCAGCTCCACTCCTCTCCCCGCGCGCCGCGCCCCGCCCC  
GCCCCGCCCCGCCCGTCTCGCCGGCCGAGCGTCCGTTGGTCCTTGAGCGCGTCCG  
ACAGTCTGTCTGTTGCGGATCCTGCCGGAGCCCCGCCGCCGGCTTGGATTCTGA  
AACCTTCCTTGATCCCTCCTGAGACATCTTTGCTGCAAGATCGAGGCTGTCCTCTGG  
TGAGAAGGTGGTGAGGCTTCCCGTCATATTCCAGCTCTGAACAGCAAC

---

#### **eccSLC7A1-3'UTR: 385bp**

TTCTTCTACTGAACATGGAGCCATTATTAAGAGTTGTGTGTTTTTTATTATGTACATTT  
GTATATTTTTTTGCTTGTTTGATGTTCTATTTTTCTAATAGTTTTCTTTTAGTTTCTTAAA  
GTTGTGATACTAGATTTAGATTCTGATGCTAACTGCAAATCAGGTTGGTCTCTGCTGG  
GTCTCTCCTGCTTTTATTTTACTTTAAGGACAAGTGTAGTTGTCGTCCACCACCTTTC  
AAAAAATGTGAAACTGCCCTGCCTCCCCTTTTTGCTGACAACACTGTGTACATTGAC  
CACTTCCTACCATACTTTATGTTGTAATAAATCAAACCTTTTTGTGGTACATTATCTCATG  
CTTCTGCAAATTCGAATAAATTCTATGGCTTCC

---

### Supplementary Table 3

Sequences of primers<sup>1</sup> and PCR reaction<sup>2</sup>

| Name            | Primer | Sequences                     | PCR conditions                                                                                                                         |
|-----------------|--------|-------------------------------|----------------------------------------------------------------------------------------------------------------------------------------|
| eccβ-actin      | FRD:   | 5' CCAGAGGCGTACAGGGATAGCA 3'  | 1. 98°C for 2 min<br>2. 50 cycles of:<br>98°C for 10 sec<br>60°C for 15 sec<br>72°C for 10 sec<br>3. 72°C for 5 min<br>4. 4°C for save |
|                 | REV:   | 5' GCGGGAAATCGTGCGTGACAT 3'   |                                                                                                                                        |
| eccSLC7A1-exon  | FRD:   | 5' CCCCACCACCCTGCAATTTCCC 3'  |                                                                                                                                        |
|                 | REV:   | 5' TGTGAGAGGCATGTTTCGTGTCT 3' |                                                                                                                                        |
| eccSLC7A1-CpG   | FRD:   | 5' CACTGGTCCAAGTTGCCGTCAG 3'  |                                                                                                                                        |
|                 | REV:   | 5' CAGAAACCACCTGCGTCCACAC 3'  |                                                                                                                                        |
| eccSLC7A1-5'UTR | FRD:   | 5' TTGCTGCAAGATCGAGGCTGTC 3'  |                                                                                                                                        |
|                 | REV:   | 5' AGAGGAGTGGAGGCTGCGGTTA 3'  |                                                                                                                                        |
| eccSLC7A1-3'UTR | FRD:   | 5' CAAGTGTAGTTGTCGTCACCA 3'   |                                                                                                                                        |
|                 | REV:   | 5' CACAACCTTAATAATGGCTCC 3'   |                                                                                                                                        |

<sup>1</sup> Oligonucleotide primers were designed by Primer Premier 6.0

<sup>2</sup> PCR reaction was performed on ProFlex™ PCR System (Thermo Fisher)

### Supplementary Table 4

Sequences of inverse primers<sup>1</sup> and PCR reaction<sup>2</sup>

| Name            | Primer | Sequences                    | PCR conditions                                                                                                                         |
|-----------------|--------|------------------------------|----------------------------------------------------------------------------------------------------------------------------------------|
| eccβ-actin      | FRD:   | 5' GCTCATTGCCAATGGTGATGAC 3' | 1. 98°C for 2 min<br>2. 50 cycles of:<br>98°C for 10 sec<br>60°C for 15 sec<br>72°C for 10 sec<br>3. 72°C for 5 min<br>4. 4°C for save |
|                 | REV:   | 5' GCTATCCAGGCTGTGCTATCCC 3' |                                                                                                                                        |
| eccSLC7A1-exon  | FRD:   | 5' GGCAGGCTTGCTTTAGCATTGA 3' |                                                                                                                                        |
|                 | REV:   | 5' ACATGCCCCATAGGGGCCCCAC 3' |                                                                                                                                        |
| eccSLC7A1-CpG   | FRD:   | 5' CCCGGAGAACCGGCTGCAGAGC 3' |                                                                                                                                        |
|                 | REV:   | 5' GGTTTGCTGTGGGACCGCCCTG 3' |                                                                                                                                        |
| eccSLC7A1-5'UTR | FRD:   | 5' GCACTGCTGATGAAACCTGGCG 3' |                                                                                                                                        |
|                 | REV:   | 5' GTTGCTGTTCAGAGCTGGAATA 3' |                                                                                                                                        |
| eccSLC7A1-3'UTR | FRD:   | 5' TTCTTCTACTGAACATGGAGCC 3' |                                                                                                                                        |
|                 | REV:   | 5' GGAAGCCATAGAATTTATTCGA 3' |                                                                                                                                        |

<sup>1</sup> Oligonucleotide primers were designed by Primer Premier 6.0

<sup>2</sup> PCR reaction was performed on ProFlex™ PCR System (Thermo Fisher)



### Supplementary Table 5

Sequences of primers<sup>1</sup> and RT-qPCR reaction<sup>2</sup>

| Gene     | Primer | Sequences                   | RT-qPCR conditions                                                         |
|----------|--------|-----------------------------|----------------------------------------------------------------------------|
| SLC7A1   | FRD:   | 5'GCCTGTGCTATGGCGAGTTT3'    | 1. 95°C for 3 min<br>2. 50 cycles of:<br>95°C for 5 sec<br>60°C for 30 sec |
|          | REV:   | 5'ACGCTTGAAGTACCGATGATGTA3' |                                                                            |
| xβ-actin | FRD:   | 5'TGCTGTCCCTGTATGCCTCTGG3'  | 3. 95°C for 5 sec<br>60°C for 1 min                                        |
|          | REV:   | 5'GGAACCGCTCGTTGCCAATAGT3'  |                                                                            |
| GAPDH    | FRD:   | 5'CGGATTTGGTCGTATTGGG3'     | 4. 50°C for 30 sec                                                         |
|          | REV:   | 5'CTGGAAGATGGTGATGGGATT3'   |                                                                            |

<sup>1</sup> Oligonucleotide primers were designed by Primer Premier 6.0

<sup>2</sup> RT-qPCR reaction was performed on ROCHE LightCycler480 System (Rotor gene 6000 Software, Sydney, Australia).
